# Supplementary material for: The Impact of Exposure to Hexavalent Chromium on the Incidence and Mortality of Oral and Gastrointestinal Cancers and Benign Diseases: A Systematic Review of Observational Studies, Reviews and Meta-Analyses
Source: MDPI journal article supplement (doi:10.3390/environments11010011), 2024-01-04
Supplement: s1 [file s1]

Archive with 1 entries (1 files):
- environments-2743901-supplementary.pdf
